# Supplementary material
Source: HighWire-hosted journal article supplement (https://bmjopen.bmj.com/content/12/7/e059782)
Supplement: inline-supplementary-material-1 [file inline-supplementary-material-1.pdf]

**Inclusion Assessment Form**  
Sex and immune checkpoint inhibitor (ICI) treatment

Reviewer: \_\_\_\_\_ Date: \_\_\_\_\_

Reference: \_\_\_\_\_

Instructions: Complete the form on each study. If the final decision is “no”, exclude that study.

**CRITERIA**

|    |                                                                                                         |  | Yes | No  | Unsure |
|----|---------------------------------------------------------------------------------------------------------|--|-----|-----|--------|
| 1. | Study Publication                                                                                       |  |     |     |        |
|    | Is the study a full manuscript?                                                                         |  | [ ] | [ ] | [ ]    |
|    | Was the study published between January 2010 and December 2021?                                         |  | [ ] | [ ] | [ ]    |
|    | Was the study published in English?                                                                     |  | [ ] | [ ] | [ ]    |
| 2. | Study Population                                                                                        |  |     |     |        |
|    | Did the study include patients aged 18 and over?                                                        |  | [ ] | [ ] | [ ]    |
| 3. | Study Exposure                                                                                          |  |     |     |        |
|    | Were patients receiving treatment with an ICI?                                                          |  | [ ] | [ ] | [ ]    |
|    | Does the study include both males and females?                                                          |  | [ ] | [ ] | [ ]    |
| 4. | Study Outcomes                                                                                          |  |     |     |        |
|    | Did the study report on one or more outcomes?<br>i.e. The study is not an opinion, editorial, etc. only |  | [ ] | [ ] | [ ]    |
|    | Did the study report on male female comparison of outcomes?                                             |  | [ ] | [ ] | [ ]    |

**DECISION OF REVIEWER**

1. Is this study potentially relevant for this review? Yes    No    Unsure  
[ ]    [ ]    [ ]

**CONSENSUS**

Second review [ ] Include  
[ ] Exclude  
[ ] Disagree

Final consensus [ ] Include  
[ ] Exclude  
[ ] Disagree
